# Supplementary material
Source: publisher figshare collection journal article supplement (https://karger.figshare.com/ndownloader/files/15926915)
Supplement: Supplementary file 1 [file 15926915]

**Supplementary Table 1: Main definitions/abbreviations used**

| **Term**  **(alphabetical order)** | **Definition/abbreviation** |
| --- | --- |
| Anti-thyroid drugs | ATD |
| Bone marrow transplantation | BMT |
| Graves’ disease | GD: hyperthyroidism (low TSH +/- elevated FT4) with positive anti-TSH receptor (TSHR) antibodies (TRAb) and/or increased tracer uptake on thyroid scintigraphy |
| Hashimoto’s thyroiditis | HT: raised TSH with positive anti-TPO antibodies (TPOAb) and/or characteristic features on thyroid ultrasound scan (US) |
| Hematopoietic stem cell transplantation | HSCT |
| Highly active antiretroviral therapy | HAART |
| Immune Reconstitution Therapy | IRT: treatment inducing an initial immune depletion, followed by a recovery of immune cell numbers |
| Multiple Sclerosis | MS |
| Thyroid autoimmunity | TA: positivity of thyroid autoantibodies, associated or not with thyroid gland dysfunction |
| Thyroid dysfunction | TD: abnormal thyroid function tests consistent with hypothyroidism or thyrotoxicosis (subclinical or overt) |
| Destructive thyroiditis | Thyroid inflammation and destruction, characterised by transient thyrotoxicosis (sometimes absent) followed by spontaneous euthyroidism or hypothyroidism, with negative TRAb and/or reduced or absent tracer uptake on thyroid scintigraphy |
